# Supplementary material for: DNA Methyltransferase 3b Accelerates the Process of Atherosclerosis
Source: Hindawi journal article supplement (doi:10.1155/2022/5249367), 2022-01-01
Supplement: f1 [file 5249367.f1.pdf]

## Supplemental files

### Contents

#### I Supplemental Figures

**Figure S1.** The diagram of animal experiments.

**Figure S2.** The gating scheme of Treg in total peripheral blood of ApoE<sup>-/-</sup> mice

**Figure S3.** Construction, and transduction efficiency of pLVX-shRNA1-mDnmt3b

**Figure S4.** The lesion area of aortic root

#### II Supplemental Tables

**Table 1.** Sequences of *Foxp3*-TSDR used in this study.

**Table 2.** Primers sequence of quantitative RT-PCR

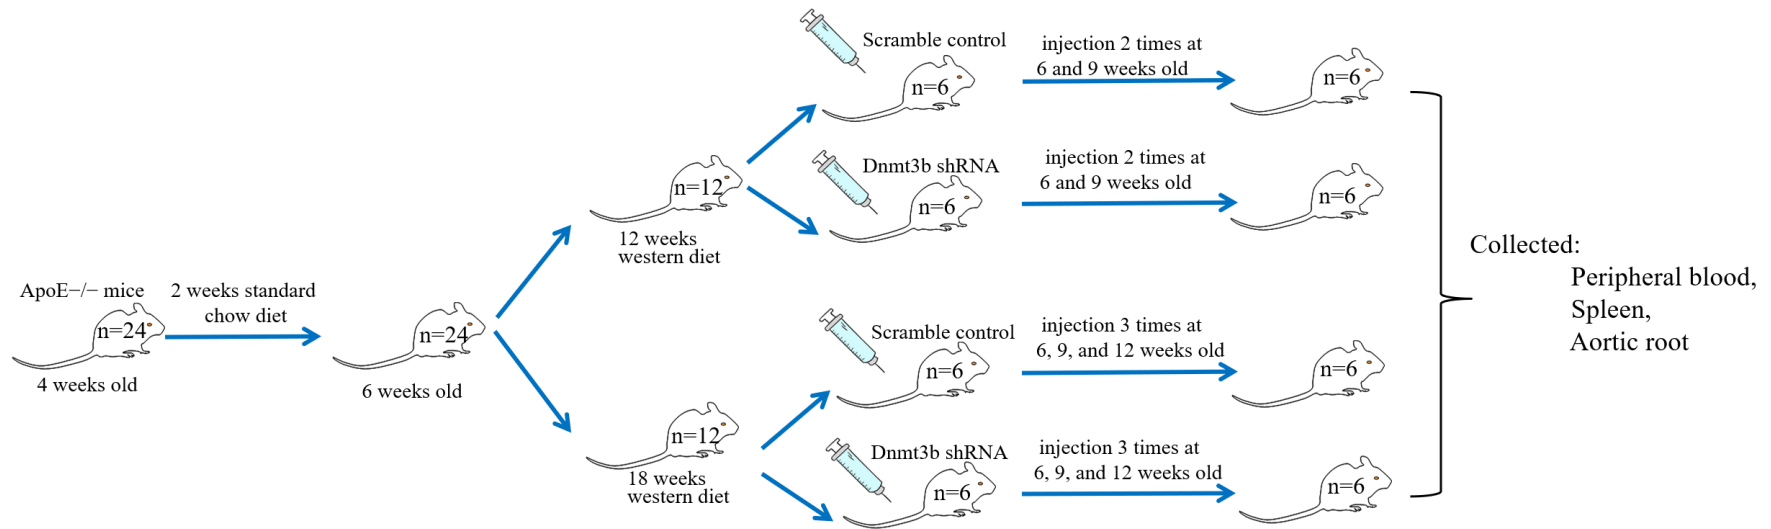

**Figure S1.** The diagram of animal experiments. Abbreviations: Dnmt3b, DNA methyltransferases 3b.

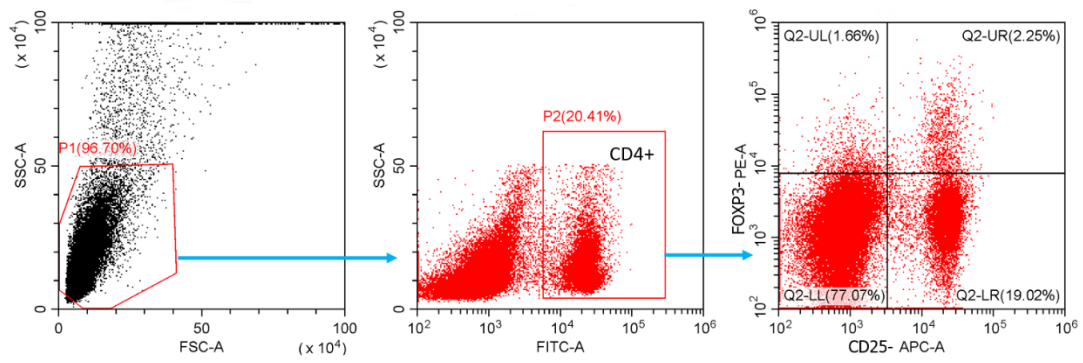

**Figure S2.** The gating scheme of Treg in total peripheral blood of ApoE<sup>-/-</sup> mice. We first gated the CD4<sup>+</sup> T cells and then gated CD25<sup>+</sup>Foxp3<sup>+</sup> in CD4<sup>+</sup> cells.

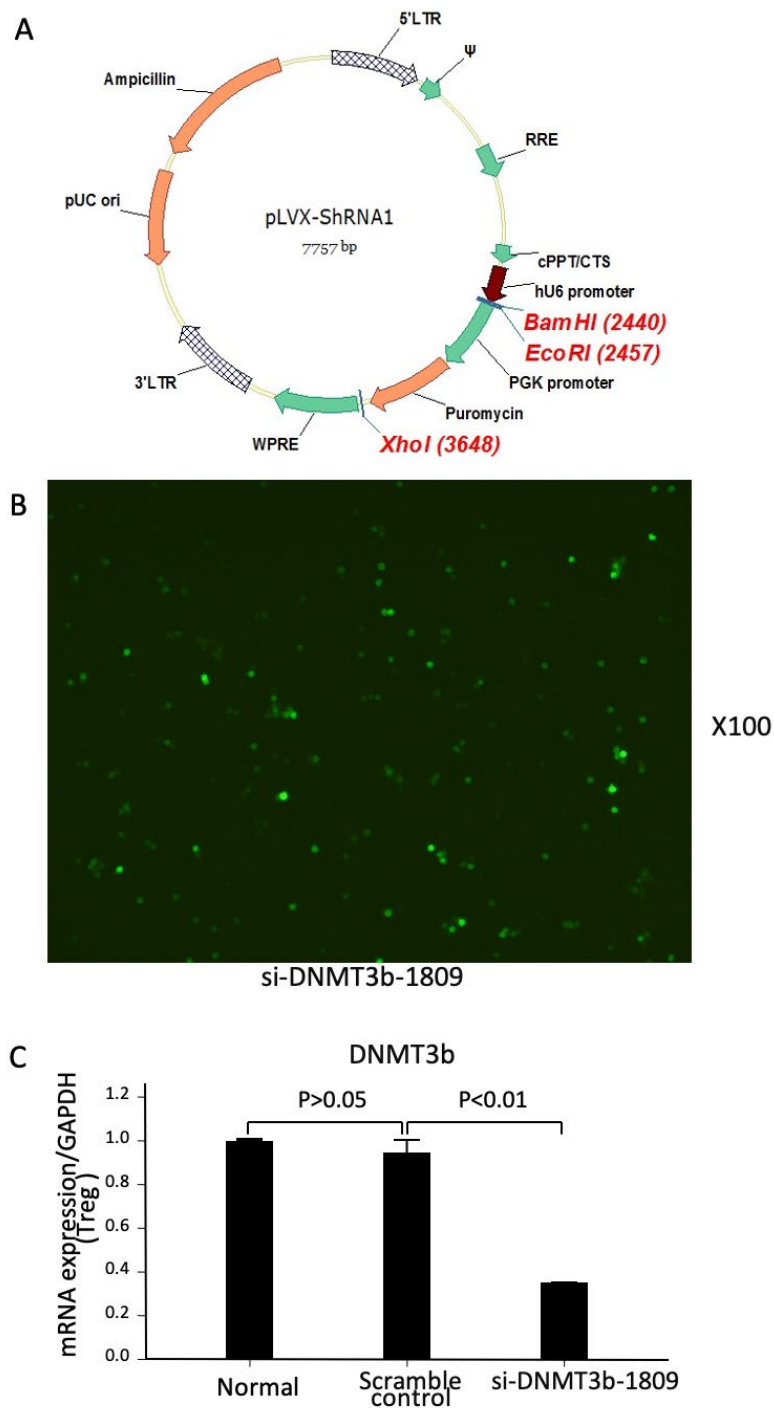

**Figure S3: Construction, and transduction efficiency of pLVX-shRNA1-mDnmt3b.** (A) structure of pLVX-shRNA1-mDnmt3b. (B) Transduction of viral vectors carrying *Dnmt3b* siRNA into isolated Tregs. (C) The mRNA level of *Dnmt3b* in spleen Treg of ApoE<sup>-/-</sup> mice transfected by viral vector carrying *Dnmt3b* siRNA. Abbreviations: Dnmt3b, DNA methyltransferases 3b.

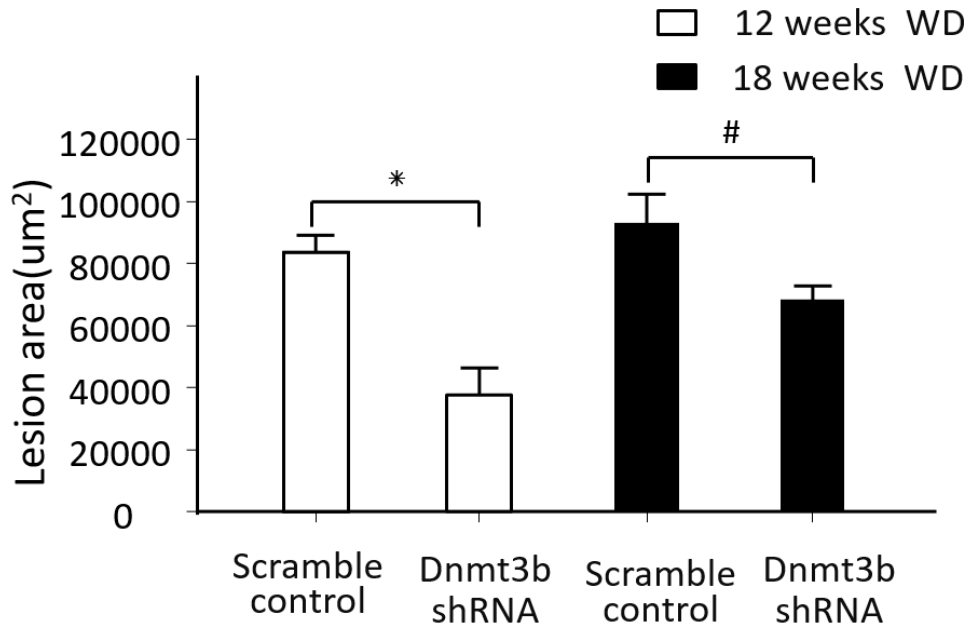

**Figure S4:** The lesion area of aortic root was measured by Oil-red O Staining. \*  $P < 0.01$ , #  $P < 0.05$ .

Abbreviations: Dnmt3b, DNA methyltransferases 3b; WD, western diet.

**Table S1 Sequences of *FOXP3*-TSDR used in this study**

| Assay type                                       | Primer  | Sequence                                                                                                                                                                                                                                                                                                    |
|--------------------------------------------------|---------|-------------------------------------------------------------------------------------------------------------------------------------------------------------------------------------------------------------------------------------------------------------------------------------------------------------|
| Mouse methylation specific qPCR                  | Forward | 5'-TTGGGTTTTTTTTGGTATTTAAGAAA-3'                                                                                                                                                                                                                                                                            |
|                                                  | Reverse | 5'-CCCTATTATCACAACTAACTTAACC-3'                                                                                                                                                                                                                                                                             |
| Bisulfite sequencing of mouse <i>Foxp3</i> -TSDR |         | TTGGGTTTTTTTTGGTATTTAAGAAAGATAGAATCG<br>ATAGAATTTGGGTTTTGTATGGTAGTTAGATGGAC<br>GTTATTTATTATATTCTTAGCATTATATTATTTATT<br>TGGGTTTATTCTGTTATAGGATAGATTAGTTATTTT<br>CGGAACGAAATTTGTGGGGTAGATTATTTGTTTTT<br>TTTTTTTTTTTTTTGTTGTCTATGAAGTTAATGTAT<br>TCGTCTTATGACTTAATGGTAGAAAAATTTGG<br>TTAAGTTTAGGTTGTGATAATAGGG |

CG: CpG site of bisulfite sequencing.

Abbreviations: *Foxp3*, Forkhead box P3; TSDR, Treg-specific demethylated region.

**Table S2 Primers sequence of quantitative RT-PCR**

| Name         | Primer  | Sequence                        | Size  |
|--------------|---------|---------------------------------|-------|
| Homo DNMT3b  | Forward | 5'-GGGCATAAAGGTAGGAAAGT-3'      | 164bp |
|              | Reverse | 5'-TTCCGCCAATCACCAAGTCAA-3'     |       |
| Homo FOXP3   | Forward | 5'-CATTCCCAGAGTTCCTCCACA-3'     | 126bp |
|              | Reverse | 5'-CATTGAGTGTCCGCTGCTTC-3'      |       |
| Homo GAPDH   | Forward | 5'-TCAAGAAGGTGGTGAAGCAGG-3'     | 115bp |
|              | Reverse | 5'-TCAAAGGTGGAGGAGTGGGT-3'      |       |
| Mouse Dnmt3b | Forward | 5'-TTGGTGCTCAAGGAGTTGGGTATTA-3' | 217bp |
|              | Reverse | 5'-GGGCAGGATTGACGTTAGAGAGA-3'   |       |
| Mouse Foxp3  | Forward | 5'-CCTTTCACCTATGCCACCCTTATCC-3' | 198bp |
|              | Reverse | 5'-TGCTCCCTTCTCGCTCTCCACT-3'    |       |
| Mouse Gapdh  | Forward | 5'-ATGGGTGTGAACCACGAGA-3'       | 229bp |
|              | Reverse | 5'-CAGGGATGATGTTCTGGGCA-3'      |       |

Abbreviations: DNMT3b, DNA methyltransferases 3b; FOXP3, Forkhead box P3; GAPDH, glyceraldehyde-3-phosphate dehydrogenase; TSDR, Treg-specific demethylated region.
